# Supplementary material for: New Polyphenol-Containing LDL Nano-Preparations in Oxidative Stress and DNA Damage: A Potential Route for Cell-Targeted PP Delivery
Source: Materials (Basel). 2020 Nov 12;13(22):5106. doi: 10.3390/ma13225106 (PMC7696759; doi:10.3390/ma13225106)
Supplement: Supplementary file 1 [file materials-13-05106-s001.pdf]

# New Polyphenol-Containing LDL Nano-Preparations in Oxidative Stress and DNA Damage: A Potential Route for Cell-Targeted PP Delivery

Hanna Lewandowska <sup>1,\*</sup> and Monika Kalinowska <sup>2</sup>

<sup>1</sup> Centre for Radiation Research and Technology, Institute of Nuclear Chemistry and Technology, 16 Dorodna St., 03195 Warsaw, Poland

<sup>2</sup> Department of Chemistry, Biology and Biotechnology, Faculty of Civil Engineering and Environmental Sciences, Bialystok University of Technology, Wiejska 45E Street, 15351 Bialystok, Poland; m.kalinowska@pb.edu.pl

\* Correspondence: h.lewandowska@ichtj.waw.pl; Tel.: +48-225-041-084

Received: 14 October 2020; Accepted: 10 November 2020; Published: date

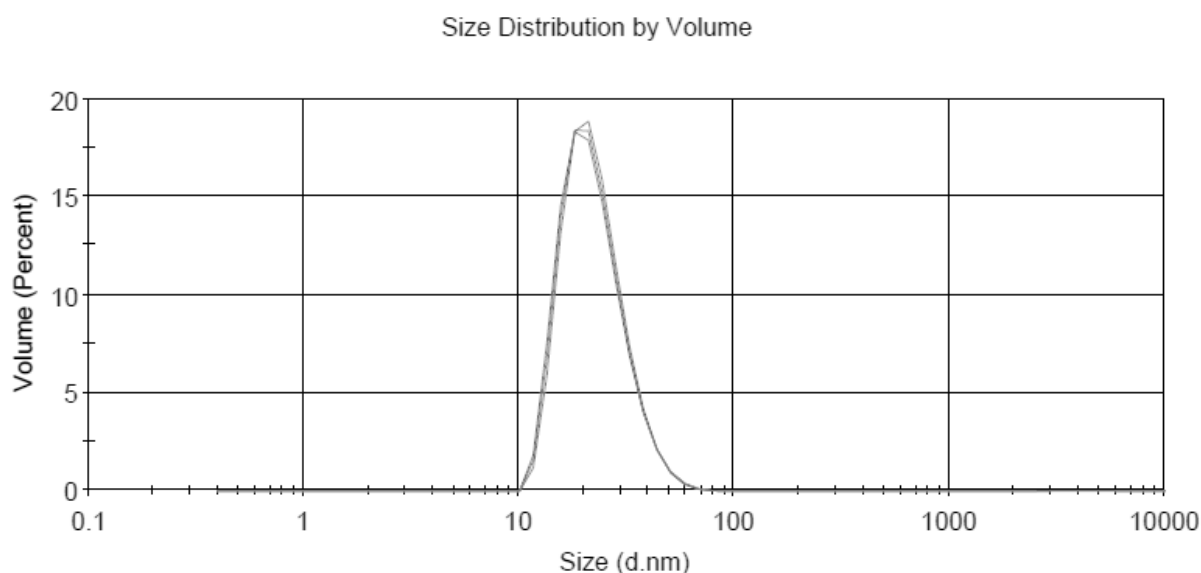

**Figure S1.** DLS measurement of the size distribution of the obtained LDL preparation. Three reps of measurements are overlaid.

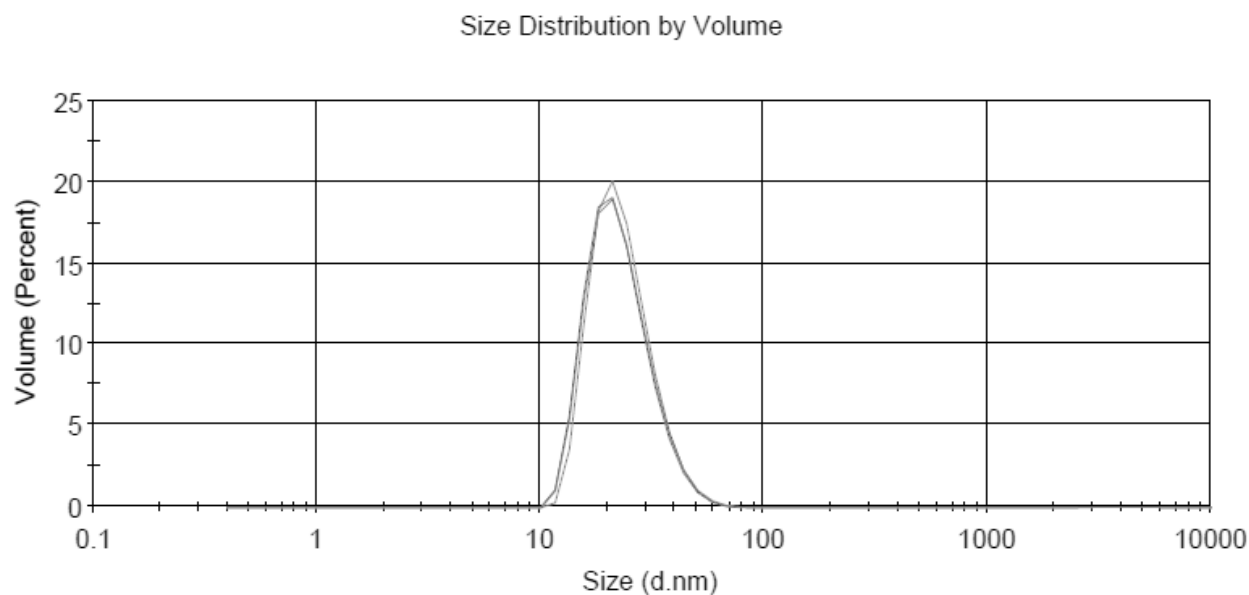

**Figure S2.** DLS measurement of the size distribution of the obtained QLDL preparation (0.5 mg of Q per mL of LDL, 6 mg/mL of protein, incubated 11h at RT, with shaking in the dark). Three reps of measurements are overlaid.

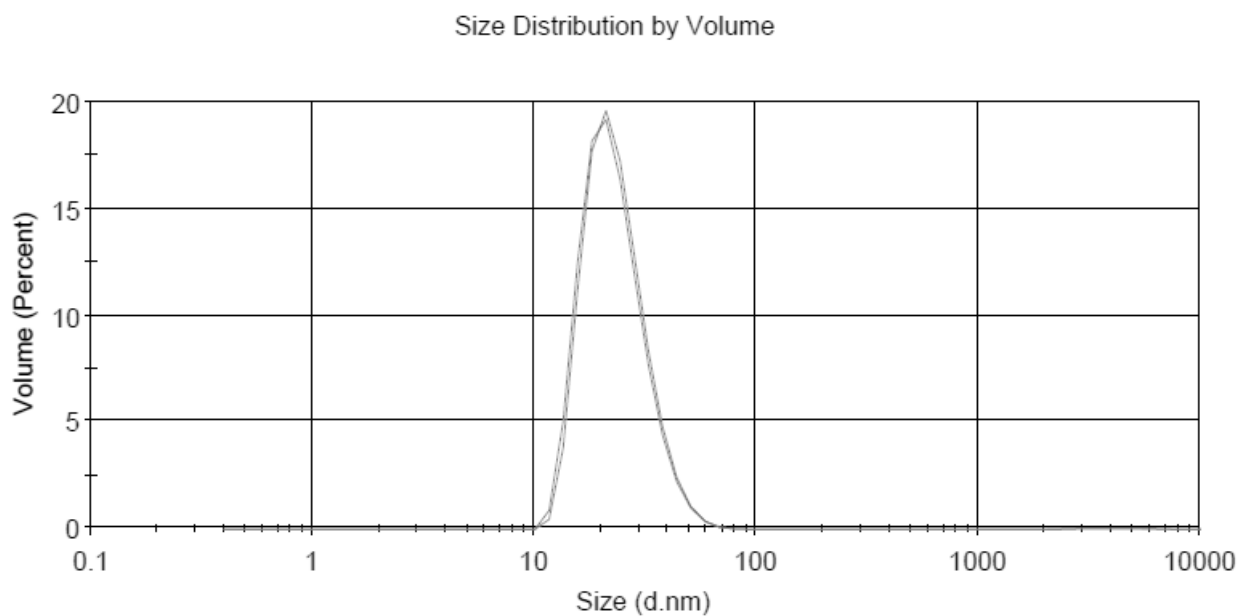

**Figure S3.** DLS measurement of the size distribution of the obtained CurLDL preparation (0.5 mg of Cur per mL of LDL, 6 mg/mL of protein, incubated 11h at RT, with shaking in the dark). Three reps of measurements are overlaid.

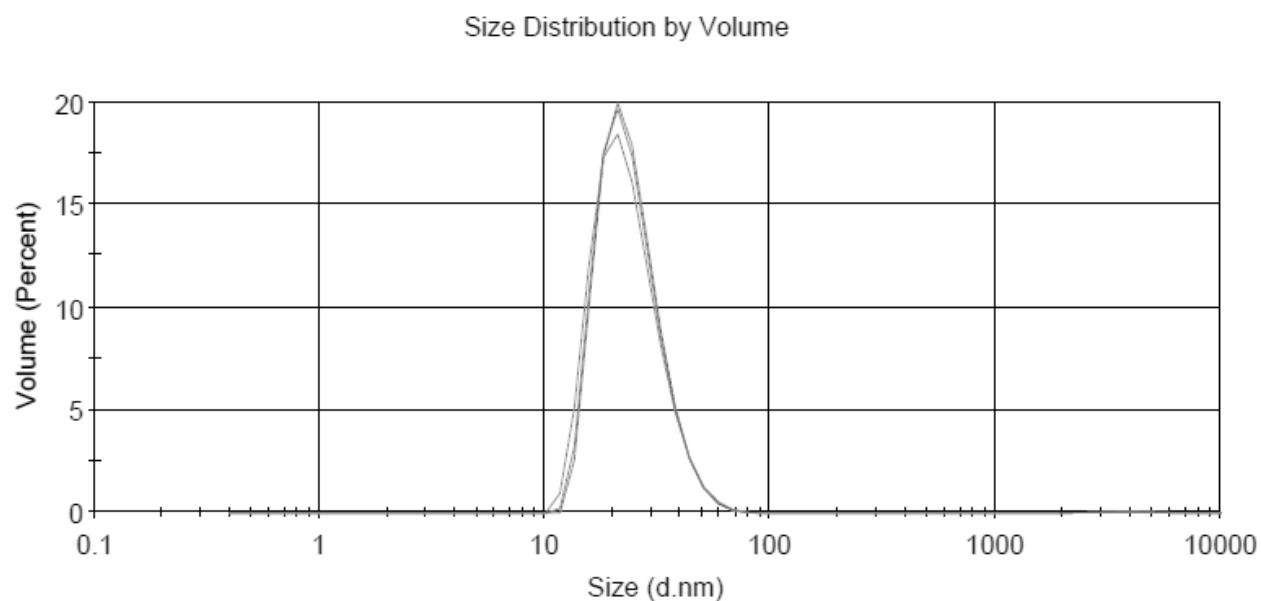

**Figure S4.** DLS measurement of the size distribution of the obtained CLALDL preparation (0.5 mg of CLA per mL of LDL, 6 mg/mL of protein, incubated 11h at RT, with shaking in the dark). Three reps of measurements are overlaid.

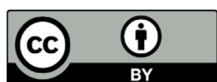

© 2020 by the authors. Submitted for possible open access publication under the terms and conditions of the Creative Commons Attribution (CC BY) license (<http://creativecommons.org/licenses/by/4.0/>).
